# Supplementary material for: Nipbl Haploinsufficiency Leads to Delayed Outflow Tract Septation and Aortic Valve Thickening
Source: MDPI journal article supplement (doi:10.3390/ijms242115564), 2023-10-25
Supplement: s1 [file s1]

## Supplementary Materials

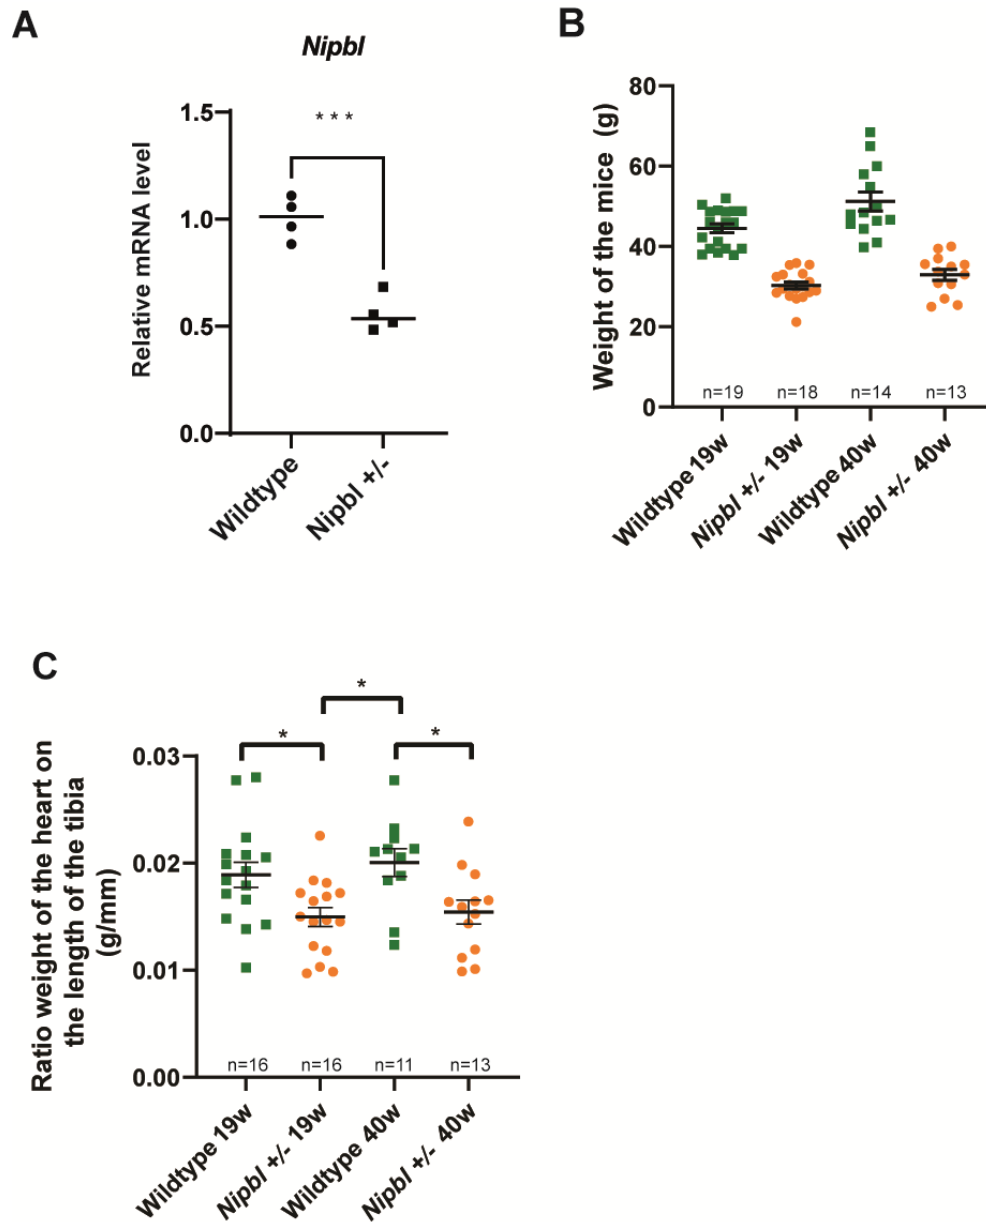

**Supplemental Figure S1. A** *Nipbl* transcript levels in whole E9.5 embryos. \*\*\* $p < 0.001$ , two-sided and unpaired t test. **B** Weight in grams of *Nipbl*<sup>+/-</sup> and wild-type littermate controls at 19 and 40 weeks. **C** Heart weight over tibia length ratios at 19 and 40 weeks. \* $p < 0.05$ , one way ANOVA with multiple comparisons.

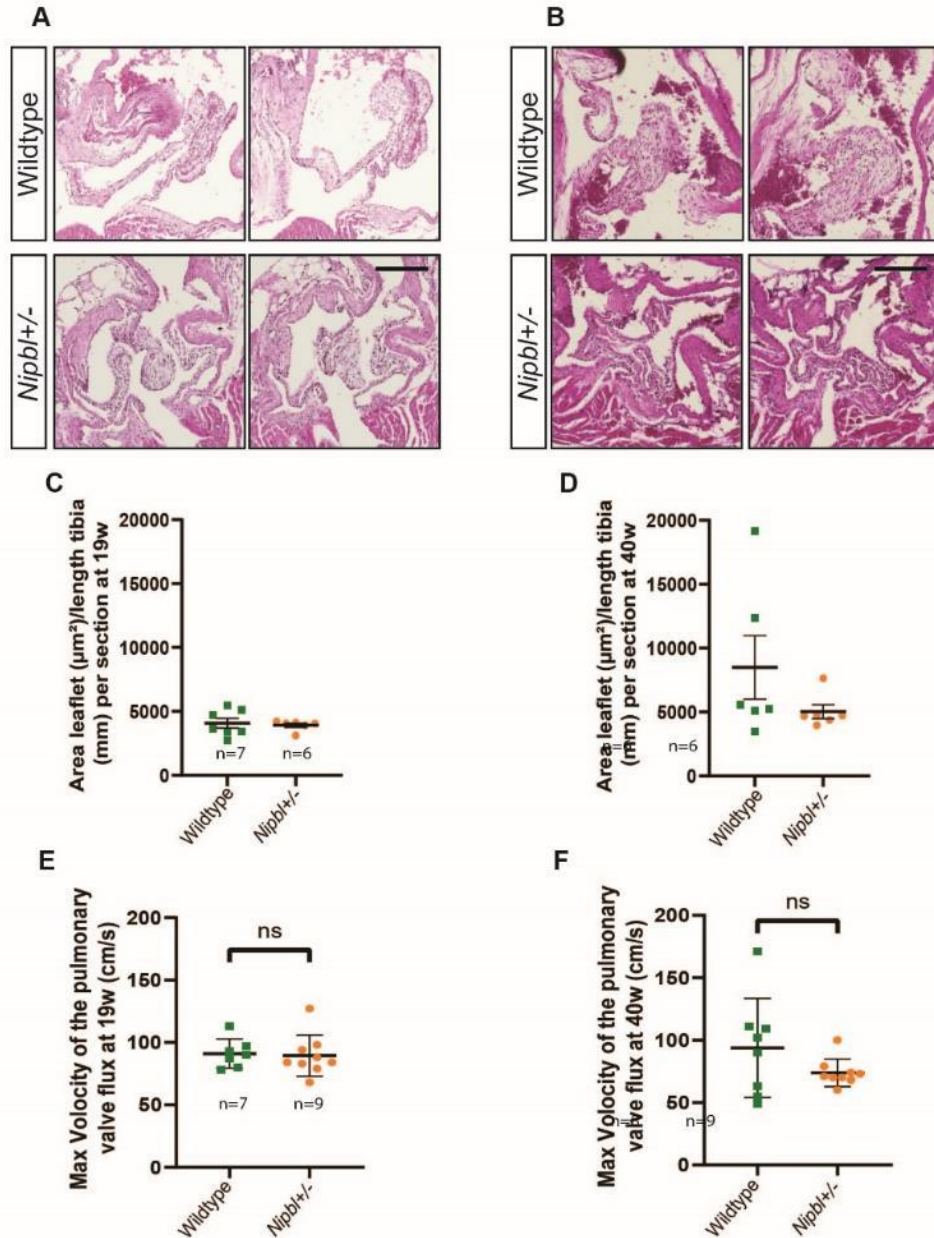

**Supplemental Figure S2. A-B.** Hematoxylin eosin stained sections of pulmonary valves from representative 19 and 40 week-old male wild-type (WT) and *Nipbl*<sup>+/-</sup> mice. **C-D.** Quantification of average pulmonary valve area over tibia length at 19 and 40 weeks. **E-F** Echocardiographic assessment of pulmonary valve function in adult wild-type control and *Nipbl*<sup>+/-</sup> mice at 19 and 40 weeks. ns = not significant,  $p > 0.05$ ; two-sided and unpaired t test. Scale bar 200 $\mu\text{m}$ .

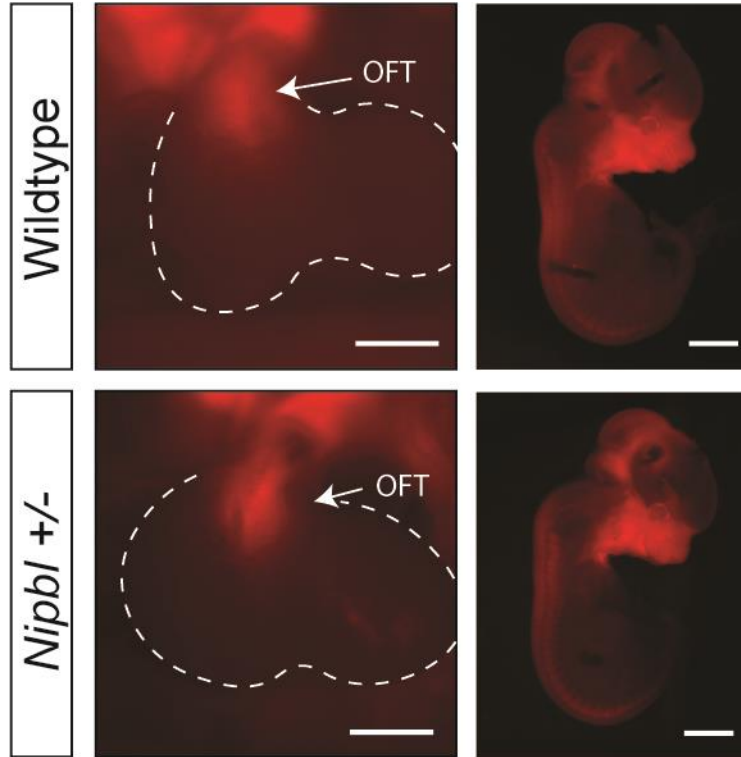

**Supplemental Figure S3.** Neural crest cell migration in *Wnt1-Cre+/-;ROSA-tdT+/-* and *Nipbl+/-;Wnt1-Cre+/-;ROSA-tdT+/-* embryos. Images show tdT+ (red) neural crest cell distribution in whole-mount heart (center) and whole-mount embryos (right). Dotted lines indicate the contour of the ventricles. Scale bars are 0.25mm (left) and 0.5mm (right).

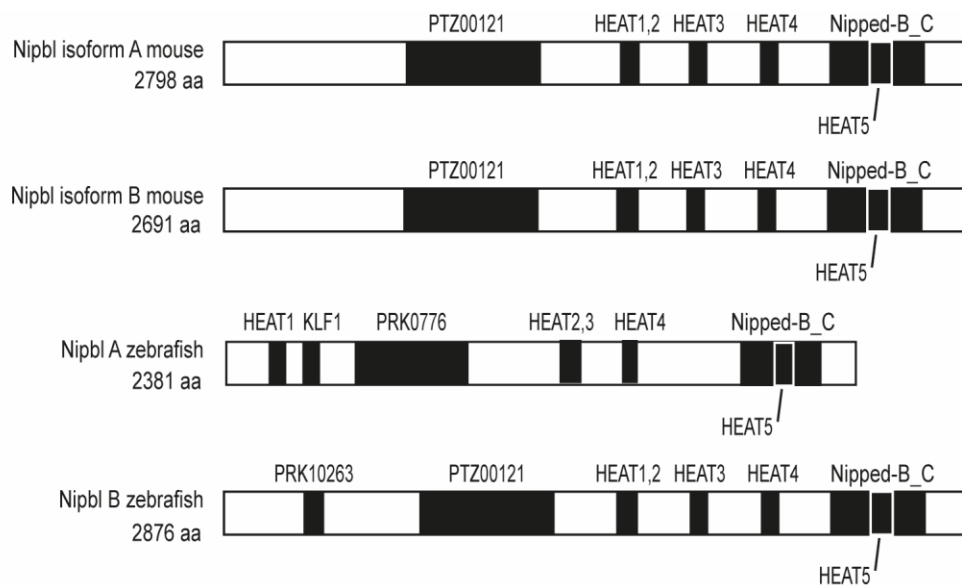

**Supplemental Figure S4.** Nipbl protein architecture conservation in mice and zebrafish. There is a strong conservation of the C-terminal Nipped-B\_C domain. C-terminal HEAT domains are involved in cohesin binding.

|                                                            | <b>Current study</b>             | <b><i>Schuster et al. [19]</i></b>                        |
|------------------------------------------------------------|----------------------------------|-----------------------------------------------------------|
| <b>Mutant model species</b>                                | Mouse                            | Zebrafish                                                 |
| <b>Approach for cohesin targeting</b>                      | Genetic deletion of Nipbl Exon 2 | Morpholino knock down of Rad21                            |
| <b>Neural crest invasion of heart</b>                      | Normal                           | Neural crest cells present but unable to invade the heart |
| <b>Defects in valve morphogenesis</b>                      | Delayed outflow tract septation  | Delay or absence of AV and/or VB development              |
| <b>Effects on valve progenitor proliferation/apoptosis</b> | None detected                    | Not assessed                                              |
| <b>Endocardial EMT</b>                                     | Normal                           | Not assessed                                              |
| <b>Adult valve defects</b>                                 | Thickening of aortic valve       | Not assessed*                                             |

AV, atrioventricular valve; VB, ventriculobulbar valve. \* due to early lethality.

**Supplemental Table S1.** Comparison phenotypic changes observed during outflow tract development in *Nipbl*<sup>+/-</sup> mice and following cohesin knockdown in zebrafish.
